# Supplementary material for: Fluorescent styrylpyrylium probes for the imaging of mitochondria in live cells
Source: Royal Society of Chemistry journal article supplement (doi:10.1039/d1ob01543e), 2021-01-01
Supplement: d1ob01543e1.pdf [file d1ob01543e1.pdf]

*Electronic Supporting Information*

## **Fluorescent styrylpyrylium probes for the imaging of mitochondria in live cells**

Ignacio Muñoz Resta,<sup>†</sup> Federico Lucantoni,<sup>‡,§</sup> Nadezda Apostolova,<sup>\* ‡,§,#</sup> Francisco Galindo<sup>\*†</sup>

<sup>†</sup>. Departamento de Química Inorgánica y Orgánica, Universitat Jaume I, Av. V. Sos Baynat s/n, 12071, Castellón, Spain. E-mail: [francisco.galindo@uji.es](mailto:francisco.galindo@uji.es)

<sup>‡</sup>. Departamento de Farmacología, Facultad de Medicina, Universidad de Valencia, Av. Blasco Ibañez n. 15-17, 46010, Valencia, Spain. E-mail: [nadezda.apostolova@uv.es](mailto:nadezda.apostolova@uv.es)

<sup>§</sup>. FISABIO (Fundación para el Fomento de la Investigación Sanitaria y Biomédica de la Comunitat Valenciana), Spain.

<sup>#</sup>. CIBERehd (Centro de Investigación Biomédica en Red: Enfermedades hepáticas y digestivas), Spain.

### **Index**

|                                                      |    |
|------------------------------------------------------|----|
| Stokes shift of commercial and synthesized dyes..... | 2  |
| Spectroscopic data of compounds.....                 | 3  |
| Lifetime measurements.....                           | 15 |
| Acid-base equilibria of hydroxypyrylium dyes .....   | 18 |
| Colocalization analysis .....                        | 19 |

## Stokes shift of commercial and synthesized dyes

**Table S1.** Stokes shifts of various commercial dyes, and those corresponding to the compounds synthesized in the present work.

| <b>Dye</b>             | <b>Stokes shift (nm)</b>                     | <b>Source</b> |
|------------------------|----------------------------------------------|---------------|
| Rhodamine 123          | 22                                           | a             |
| Nile Red               | 80                                           | a             |
| Nile Blue              | 32                                           | a             |
| Cy3                    | 14                                           | a             |
| Cy5                    | 18                                           | a             |
| Cy7                    | 25                                           | a             |
| BCEF                   | 43                                           | a             |
| DAPI                   | 97                                           | a             |
| Bodipy 500/510         | 10                                           | a             |
| Bodipy FL              | 10                                           | a             |
| Alexa Fluor 488        | 19                                           | a             |
| Dansyl                 | 190                                          | a             |
| Calcium Green          | 22                                           | a             |
| DCF                    | 20                                           | a             |
| Syto 11                | 18                                           | a             |
| TAMRA                  | 24                                           | a             |
| Texas Red              | 20                                           | a             |
| Mag-Fura-2             | 166                                          | a             |
| Oregon Green           | 25                                           | a             |
| GFP                    | 21                                           | a             |
| Cascade Yellow         | 146                                          | a             |
| Calcein AM             | 21                                           | a             |
| Lysosensor Green       | 60                                           | a             |
| Lysosensor Yellow/Blue | 155                                          | a             |
| Mitotracker Red        | 16                                           | a             |
| Mitotracker Orange     | 28                                           | a             |
| <b>1a</b>              | 136                                          | This work     |
| <b>1b</b>              | 127                                          | This work     |
| <b>1c</b>              | 114                                          | This work     |
| <b>1d</b>              | 116 (L) <sup>b</sup><br>193 (D) <sup>b</sup> | This work     |
| <b>2a</b>              | 152                                          | This work     |
| <b>2b</b>              | 36                                           | This work     |
| <b>2c</b>              | 88                                           | This work     |
| <b>2d</b>              | 103                                          | This work     |

a: data from ThermoFisher Scientific Inc. webpage

b: considering emission band L or D

## Spectroscopic data of compounds

### *2,4-bis(4-methoxyphenyl)-6-methylpyrylium tetrafluoroborate*

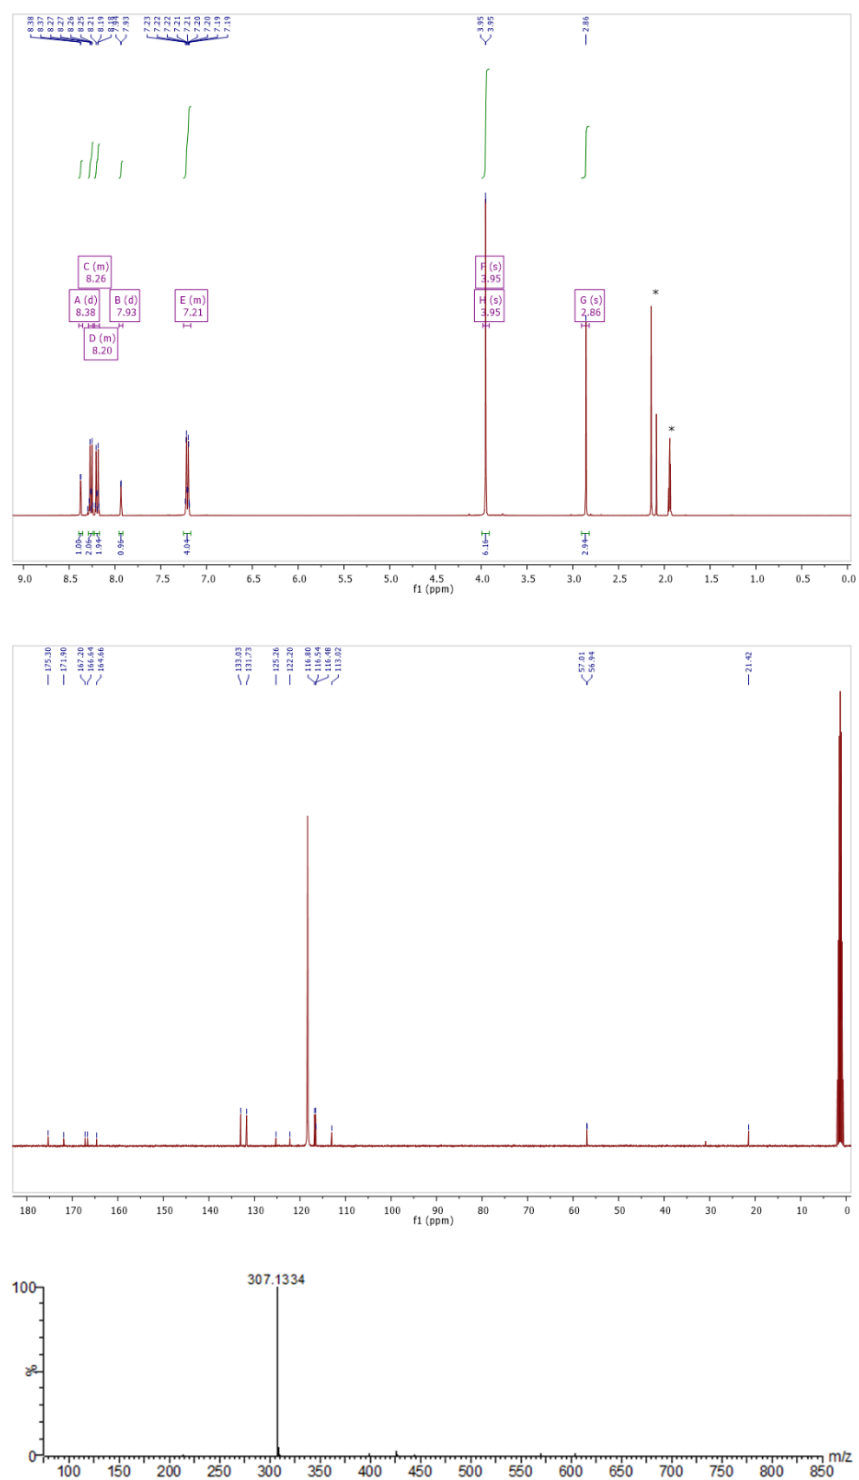

**Figure S1.** <sup>1</sup>H NMR, <sup>13</sup>C NMR (CD<sub>3</sub>CN) and HRMS spectra of the precursor *2,4-bis(4-methoxyphenyl)-6-methylpyrylium tetrafluoroborate*.

## Compound 1a

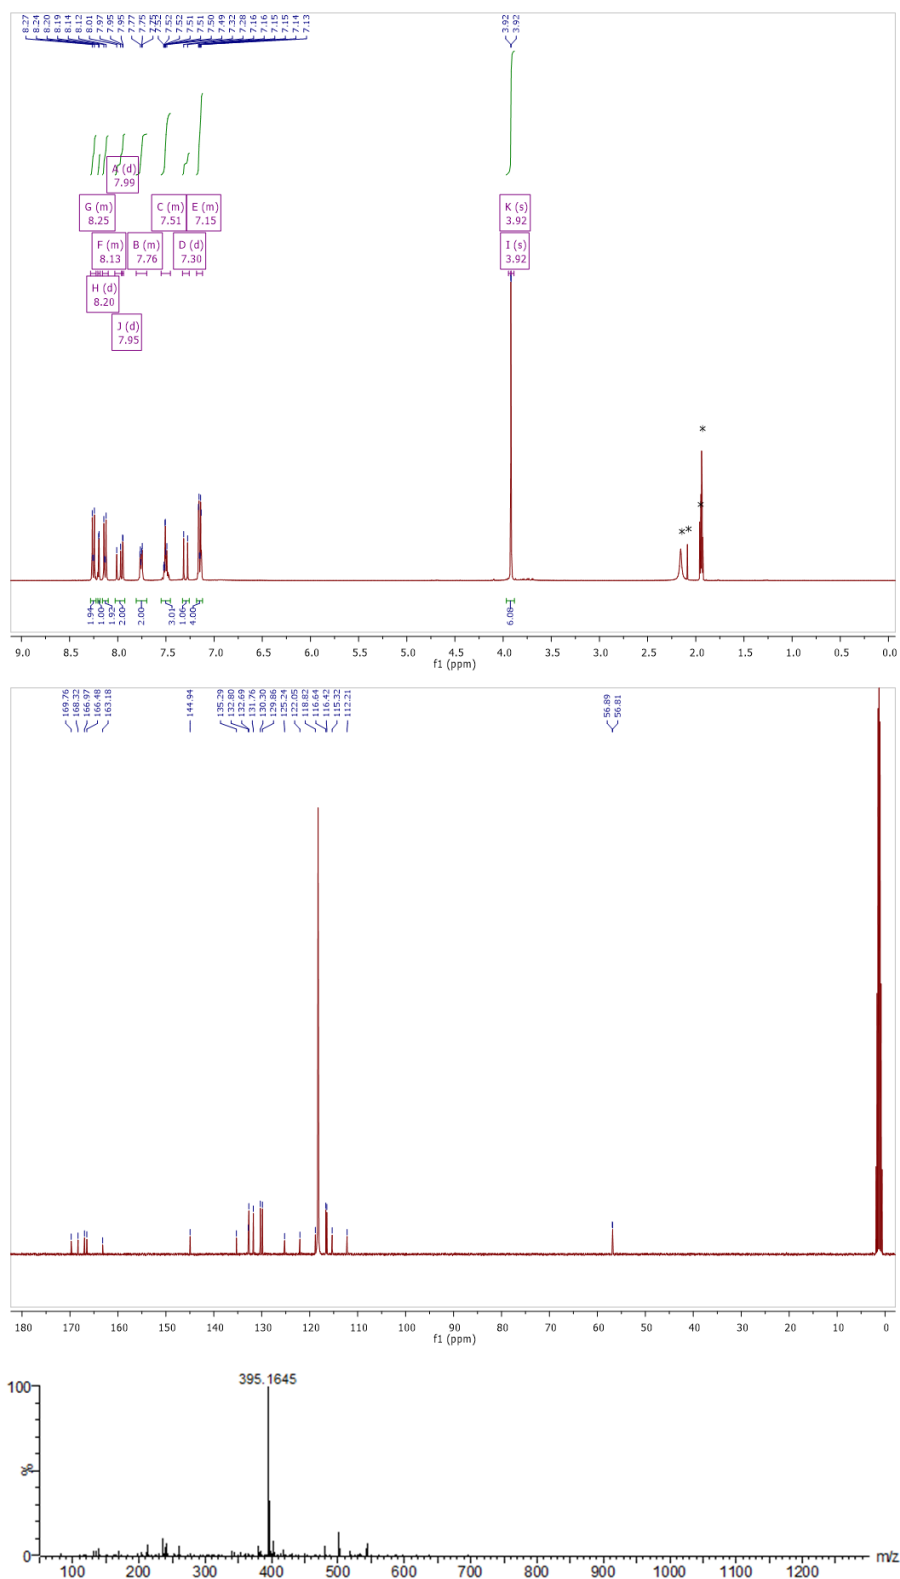

Figure S2. <sup>1</sup>H NMR, <sup>13</sup>C NMR (CD<sub>3</sub>CN) and HRMS spectra of compound 1a.

## Compound 1b

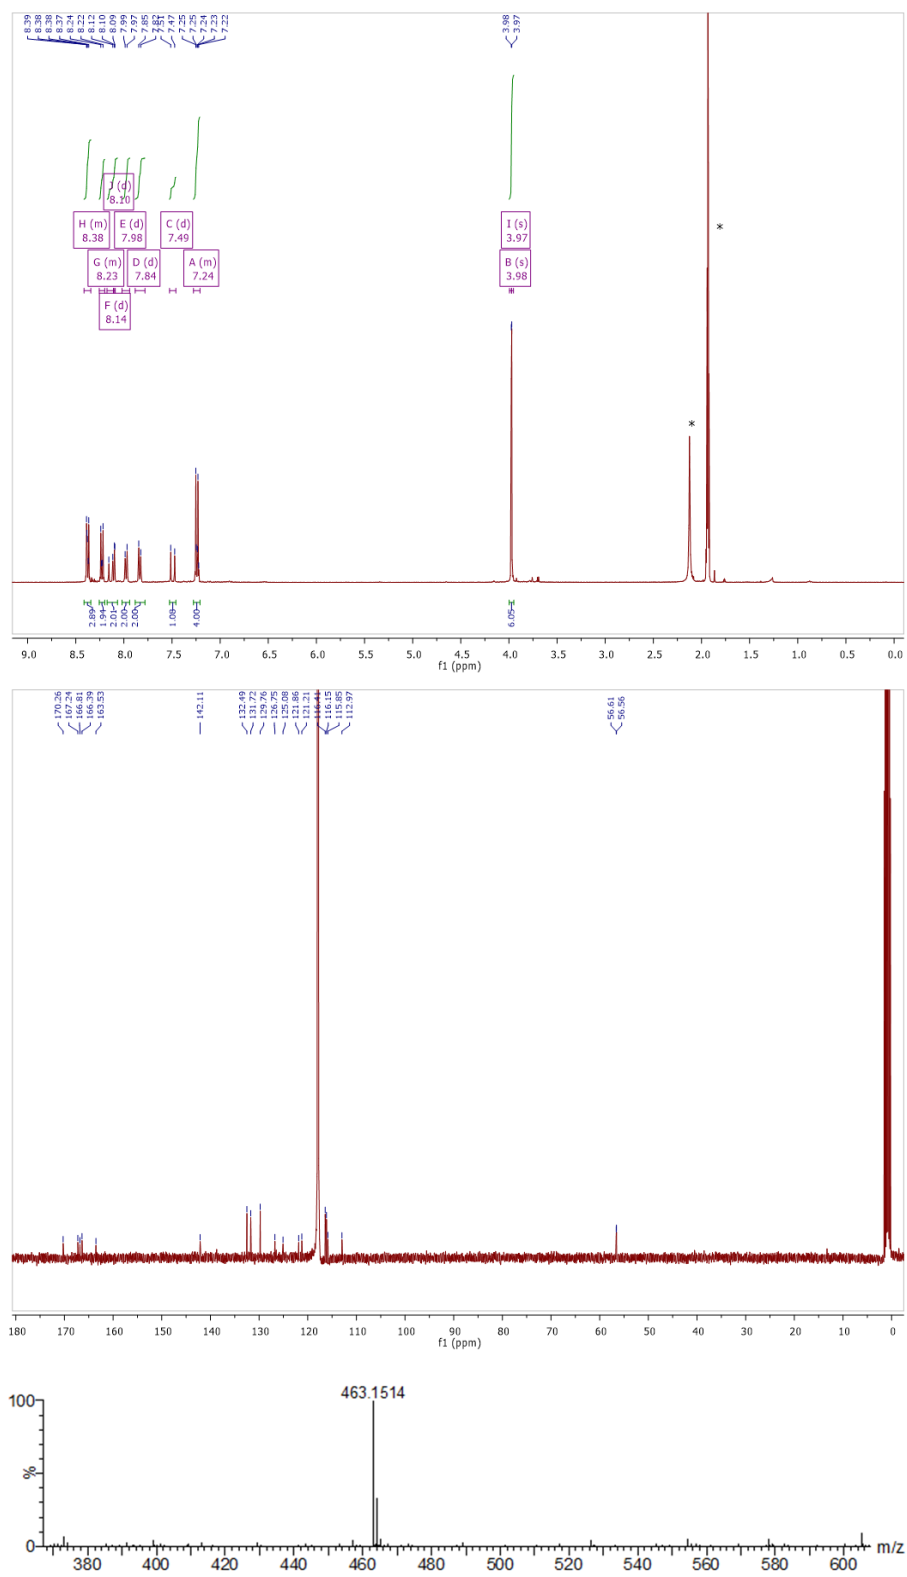

**Figure S3.** <sup>1</sup>H NMR, <sup>13</sup>C NMR (CD<sub>3</sub>CN) and HRMS spectra of compound **1b**.

## Compound 1c

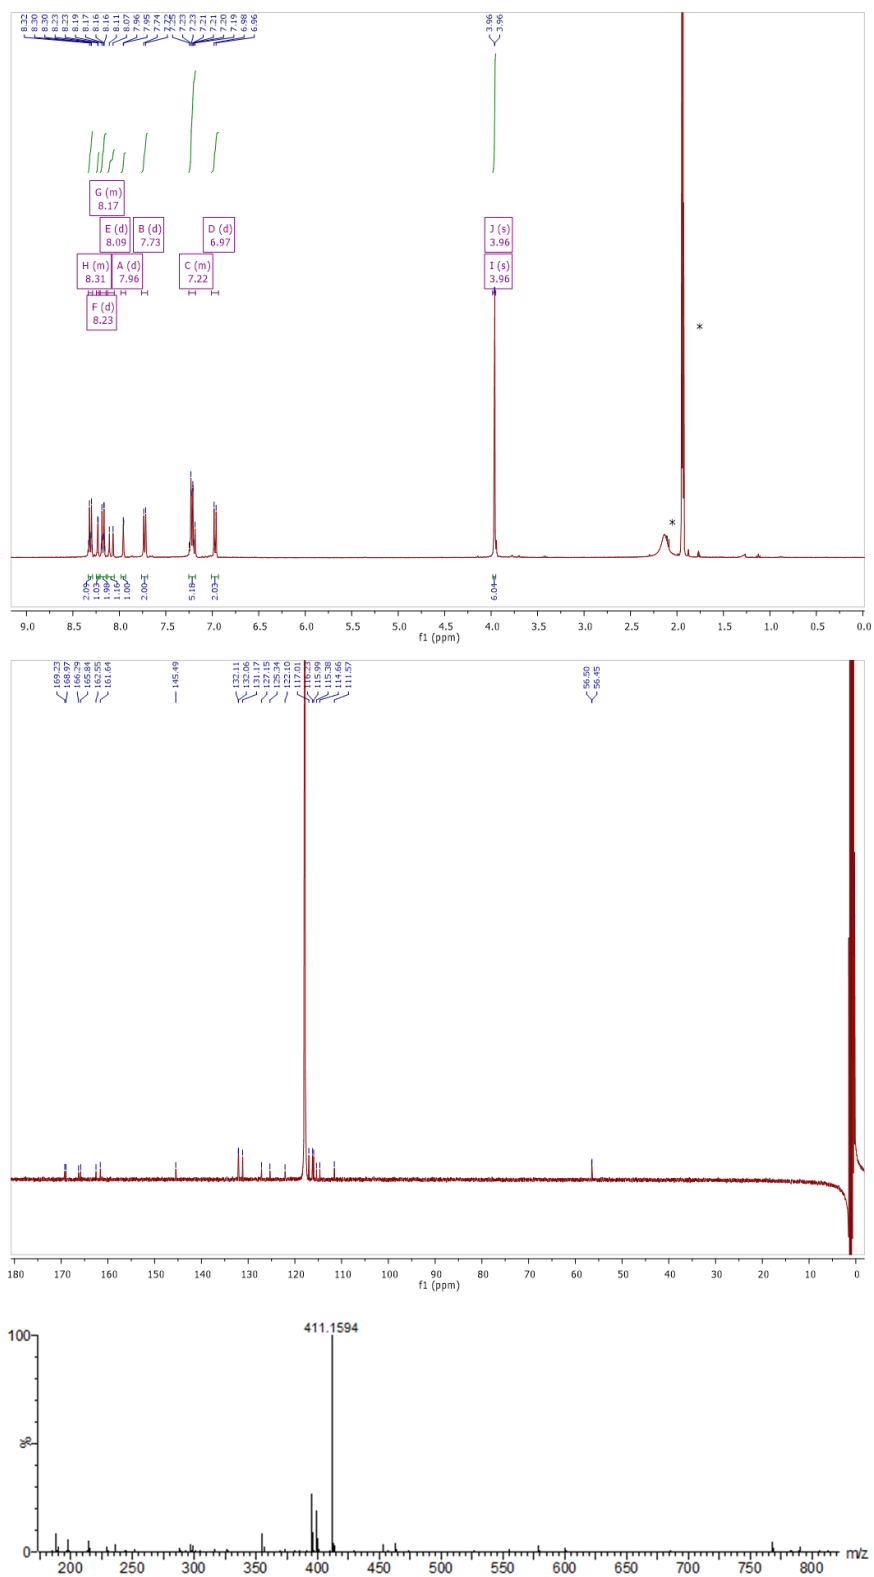

Figure S4. <sup>1</sup>H NMR, <sup>13</sup>C NMR (CD<sub>3</sub>CN) and HRMS spectra of compound 1c.

## Compound 1d

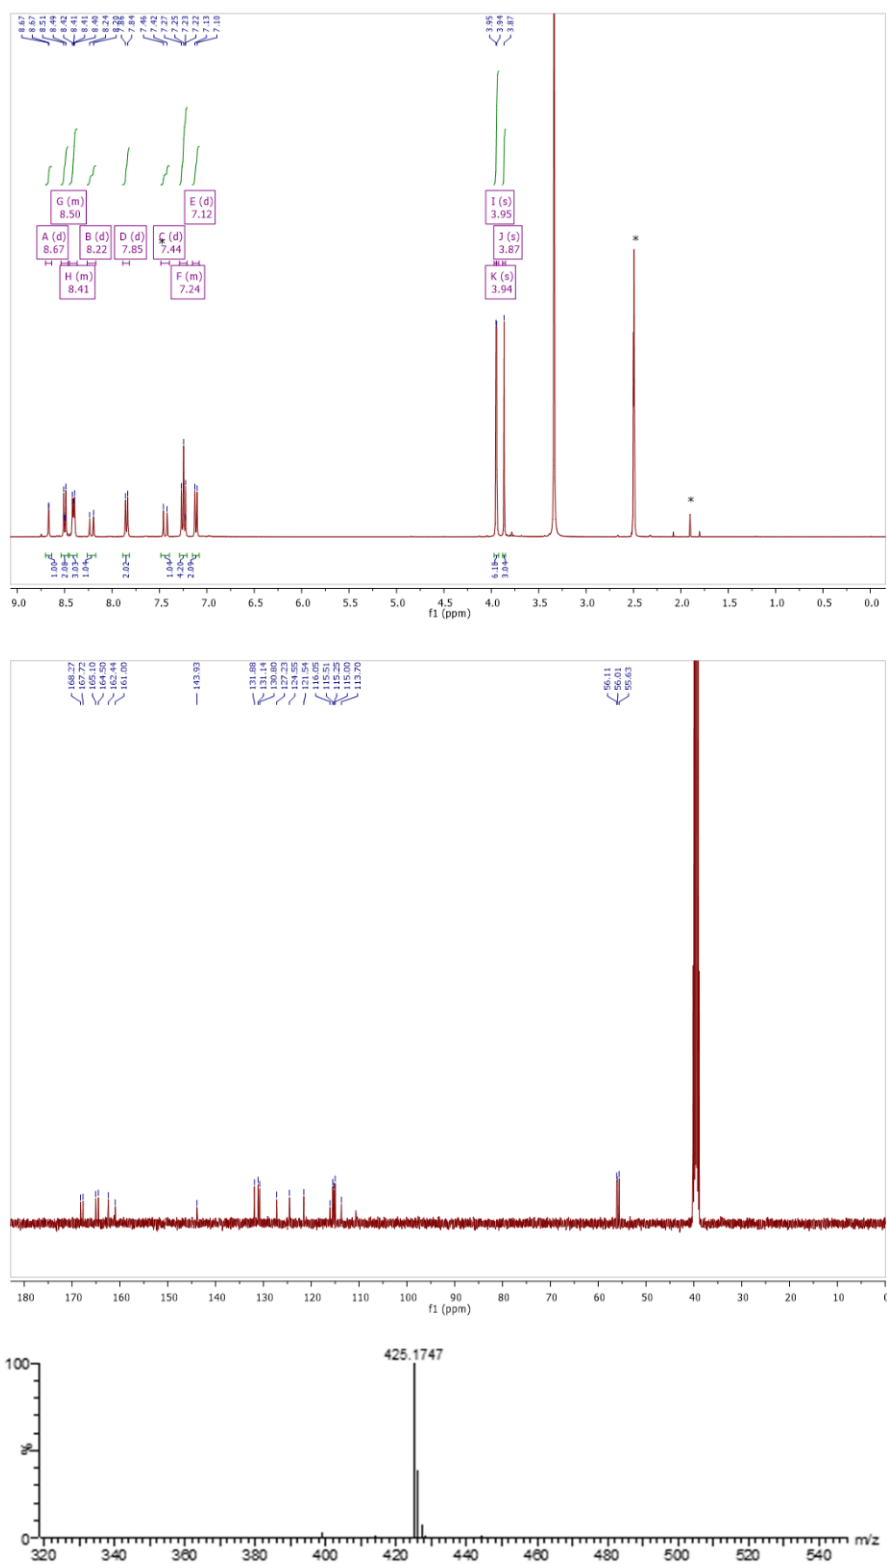

Figure S5. <sup>1</sup>H NMR, <sup>13</sup>C NMR (DMSO-d<sub>6</sub>) and HRMS spectra of compound 1d.

**2,6-bis(4-methoxyphenyl) hydrogen sulfate**

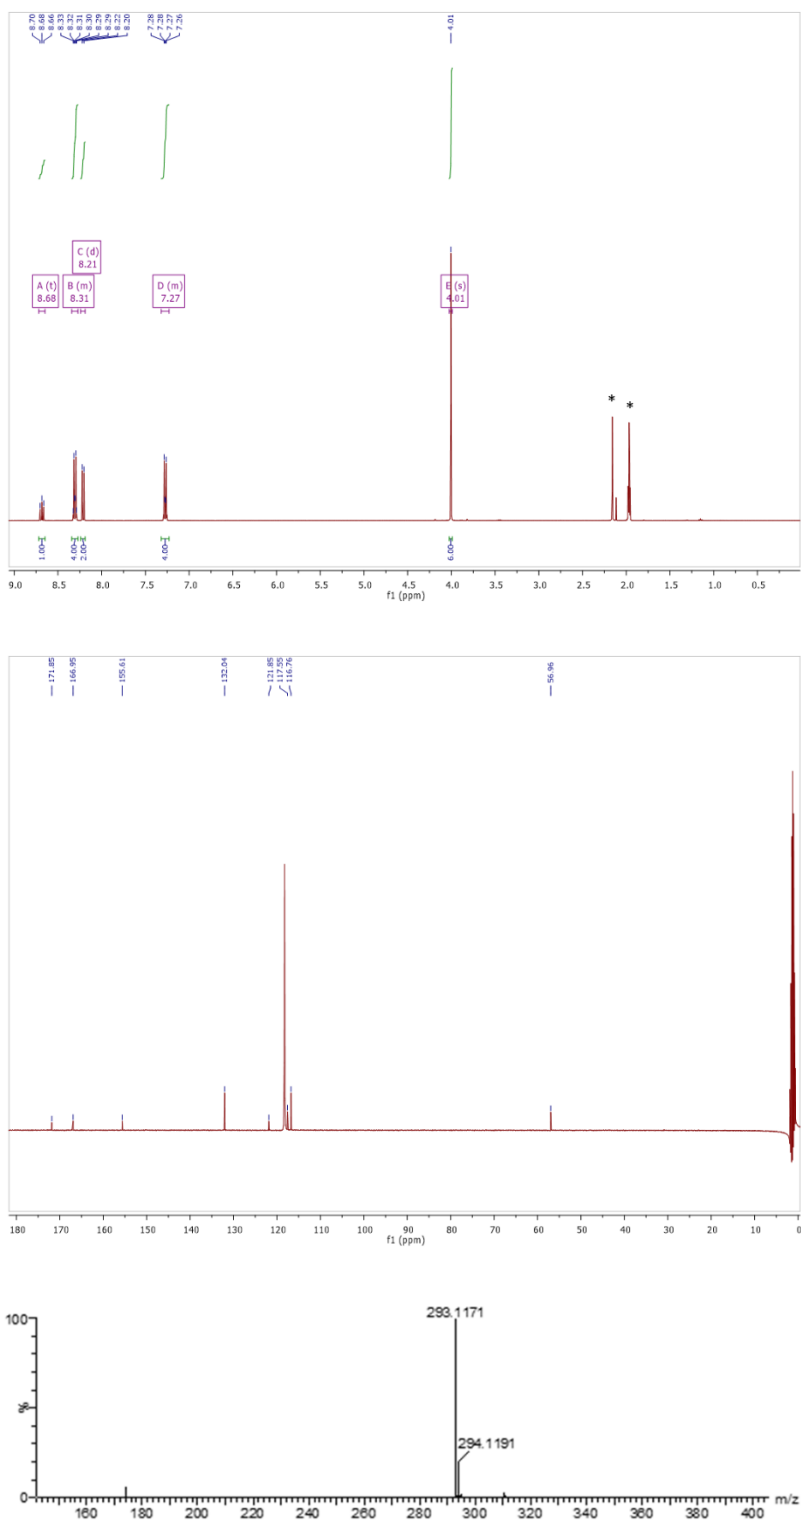

**Figure S6.** <sup>1</sup>H NMR, <sup>13</sup>C NMR (CD<sub>3</sub>CN) and HRMS spectra of the precursor 2,6-bis(4-methoxyphenyl) hydrogen sulfate.



**2,6-bis(4-methoxyphenyl)-4-methyl-4H-pyran**

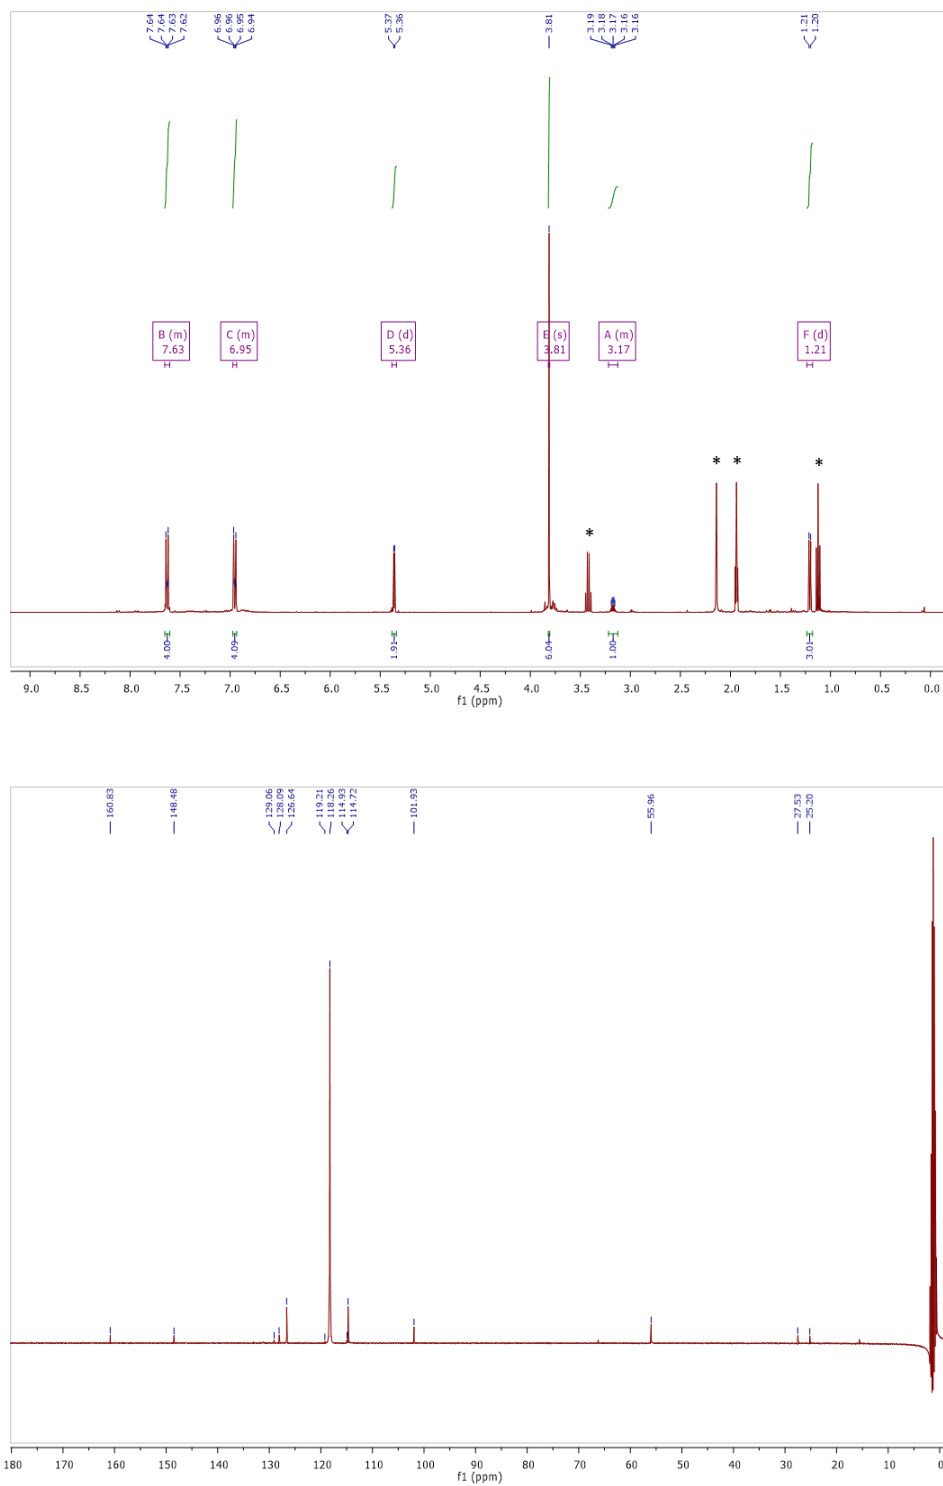

**Figure S7.** <sup>1</sup>H NMR and <sup>13</sup>C NMR (CD<sub>3</sub>CN) spectra of the precursor 2,6-bis(4-methoxyphenyl)-4-methyl-4H-pyran.

**2,6-bis(4-methoxyphenyl)-4-methylpyrylium tetrafluoroborate**

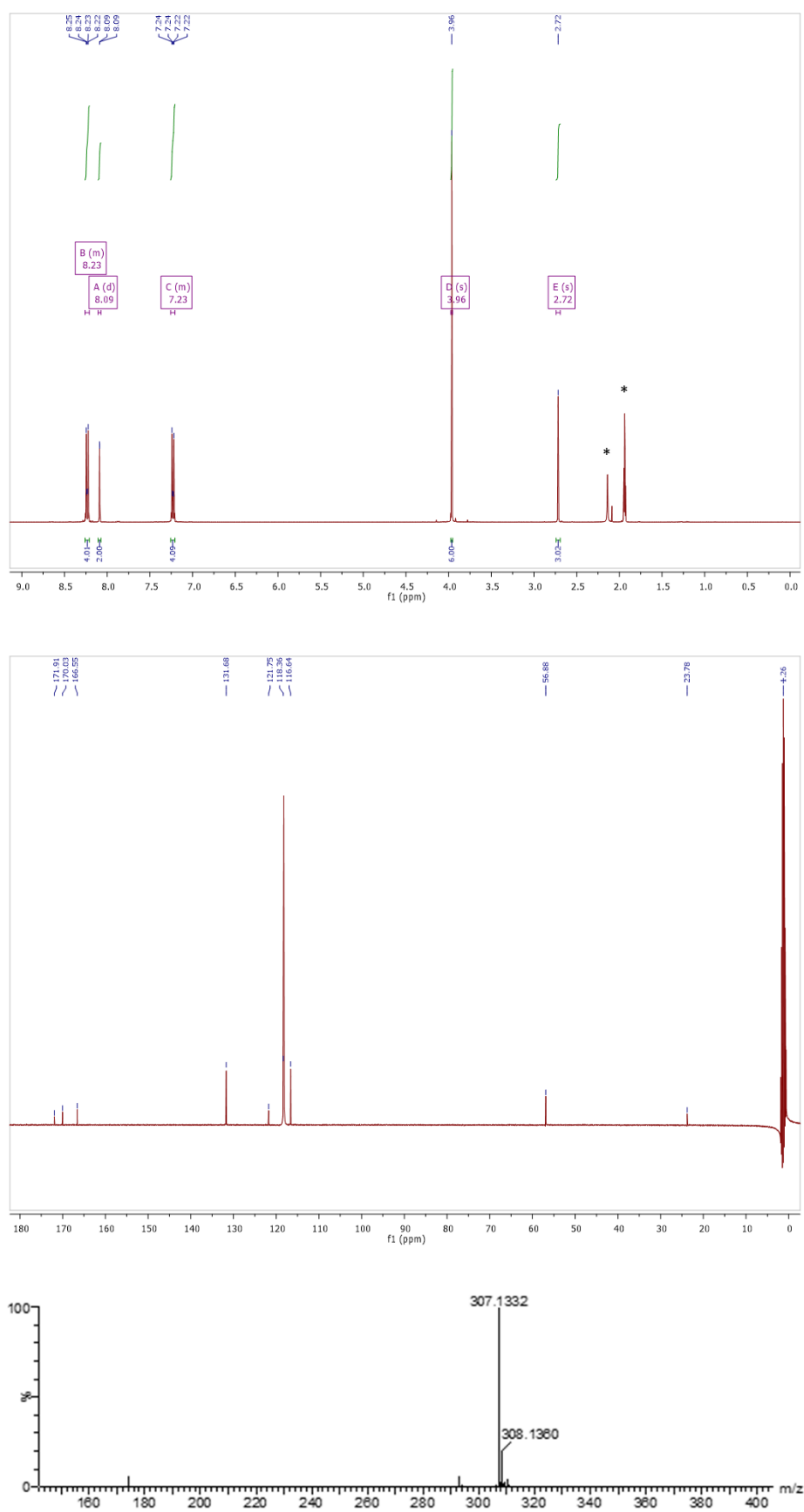

**Figure S8.** <sup>1</sup>H NMR, <sup>13</sup>C NMR (CD<sub>3</sub>CN) and HRMS spectra of the precursor 2,6-bis(4-methoxyphenyl)-4-methylpyrylium tetrafluoroborate.

## Compound 2a

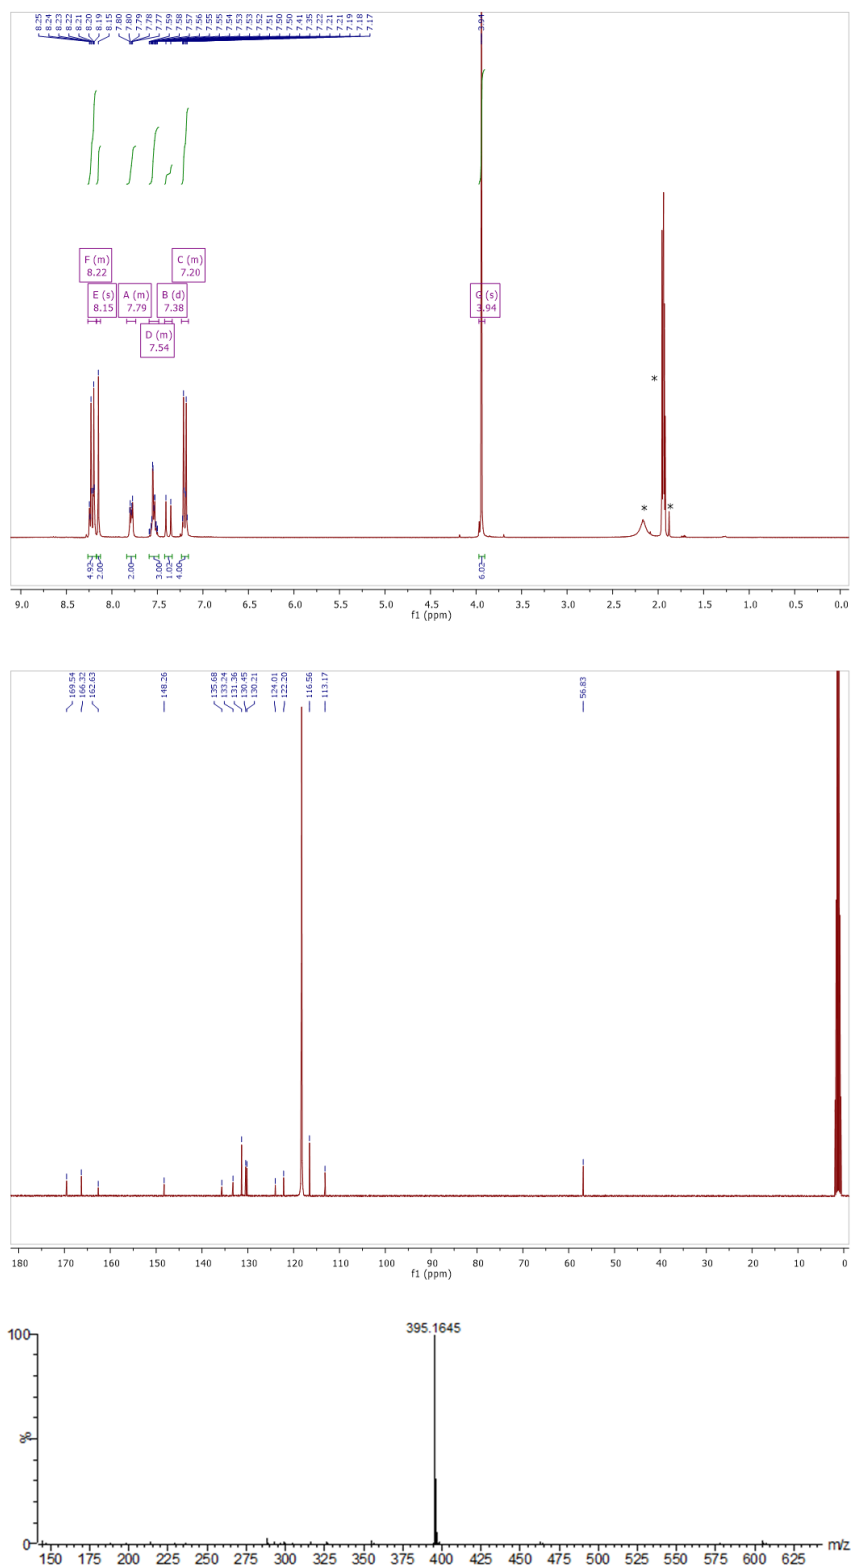

**Figure S9.**  $^1\text{H}$  NMR,  $^{13}\text{C}$  NMR ( $\text{CD}_3\text{CN}$ ) and HRMS spectra of compound **2a**.

## Compound 2b

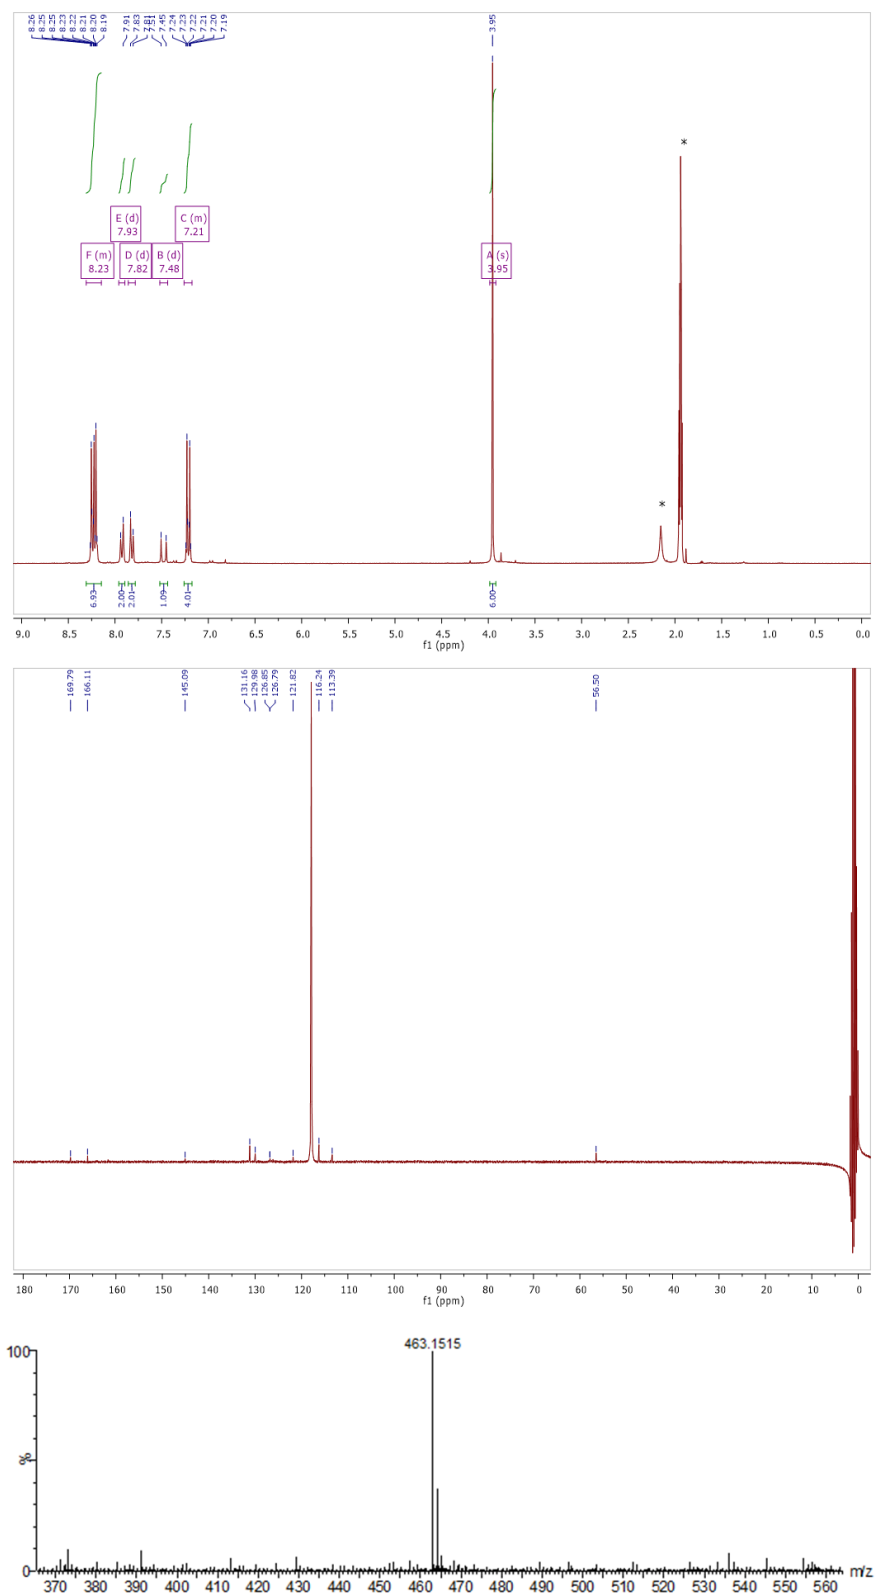

**Figure S10.**  $^1\text{H}$  NMR,  $^{13}\text{C}$  NMR ( $\text{CD}_3\text{CN}$ ) and HRMS spectra of compound **2b**.

## Compound 2c

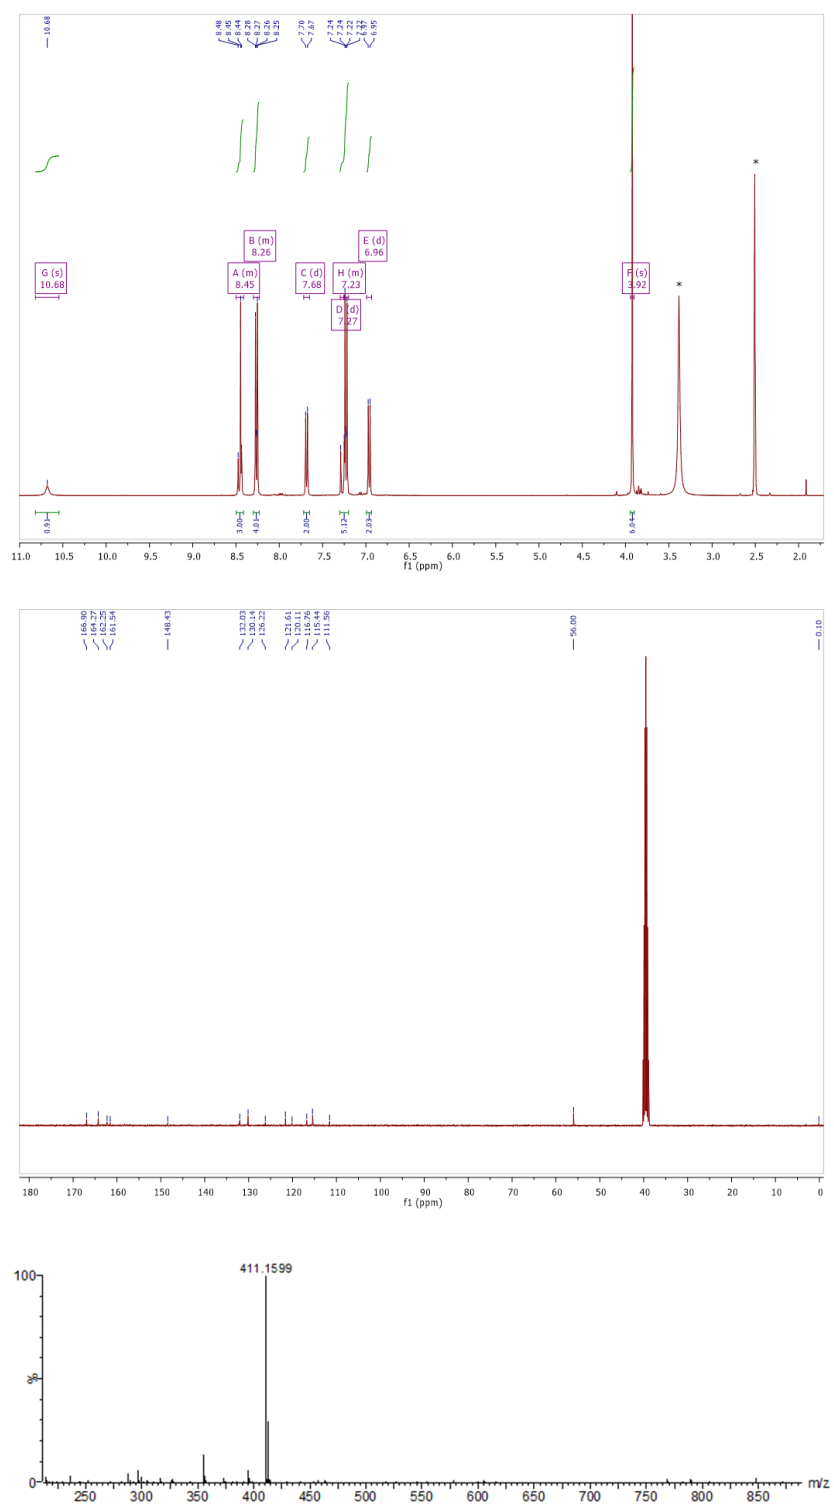

Figure S11.  $^1\text{H}$  NMR,  $^{13}\text{C}$  NMR ( $\text{CD}_3\text{CN}$ ) and HRMS spectra of compound 2c.

## Compound 2d

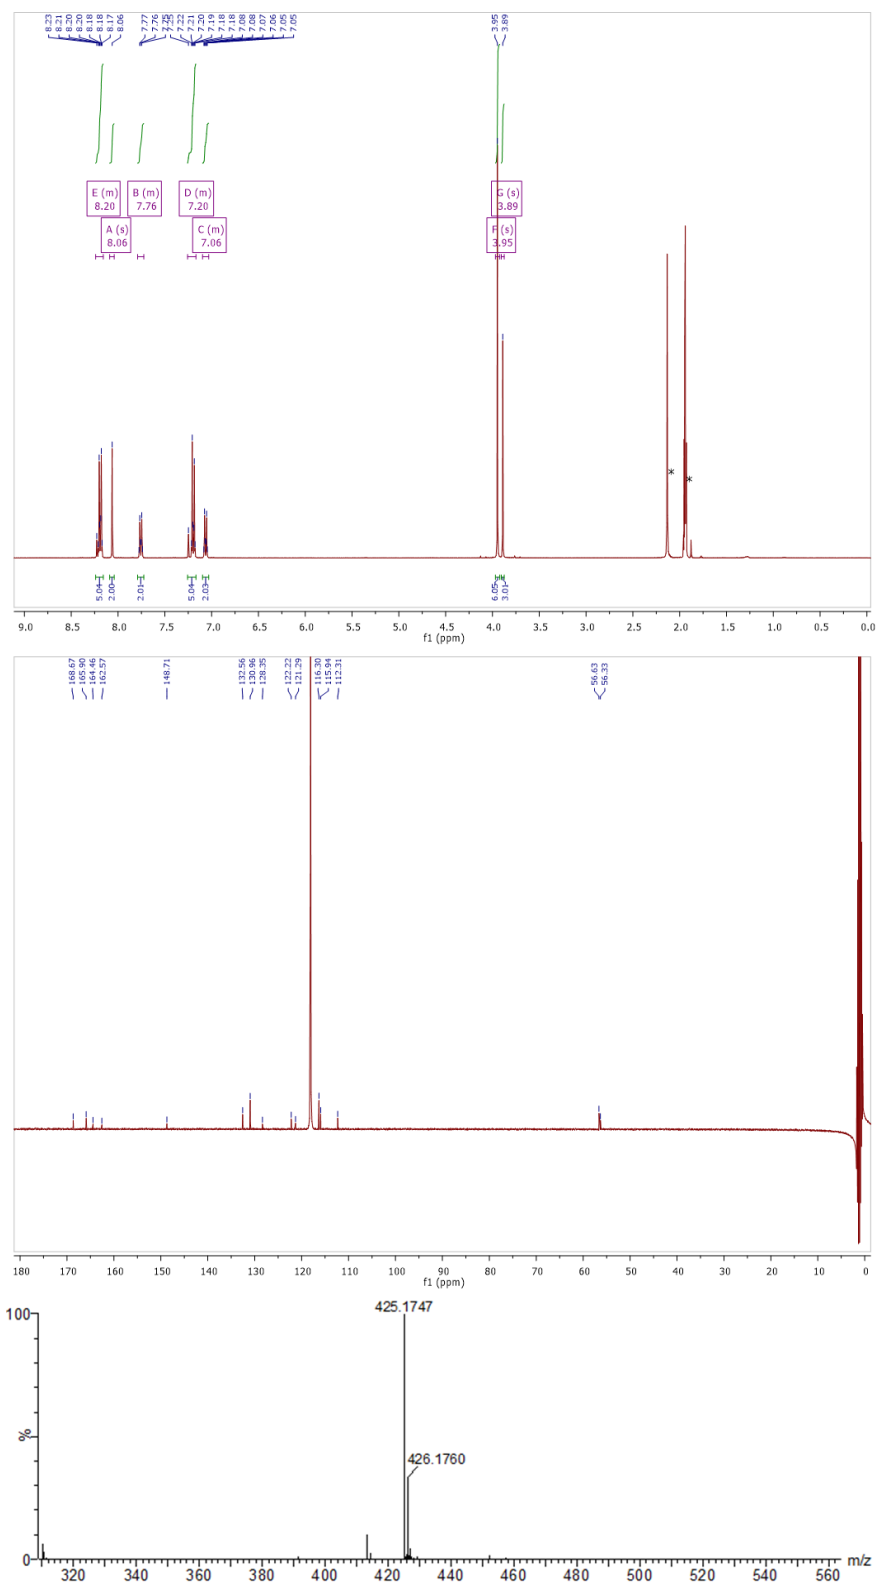

Figure S12.  $^1\text{H}$  NMR,  $^{13}\text{C}$  NMR ( $\text{CD}_3\text{CN}$ ) and HRMS spectra of compound 2d.

## Measurements of the fluorescence lifetime

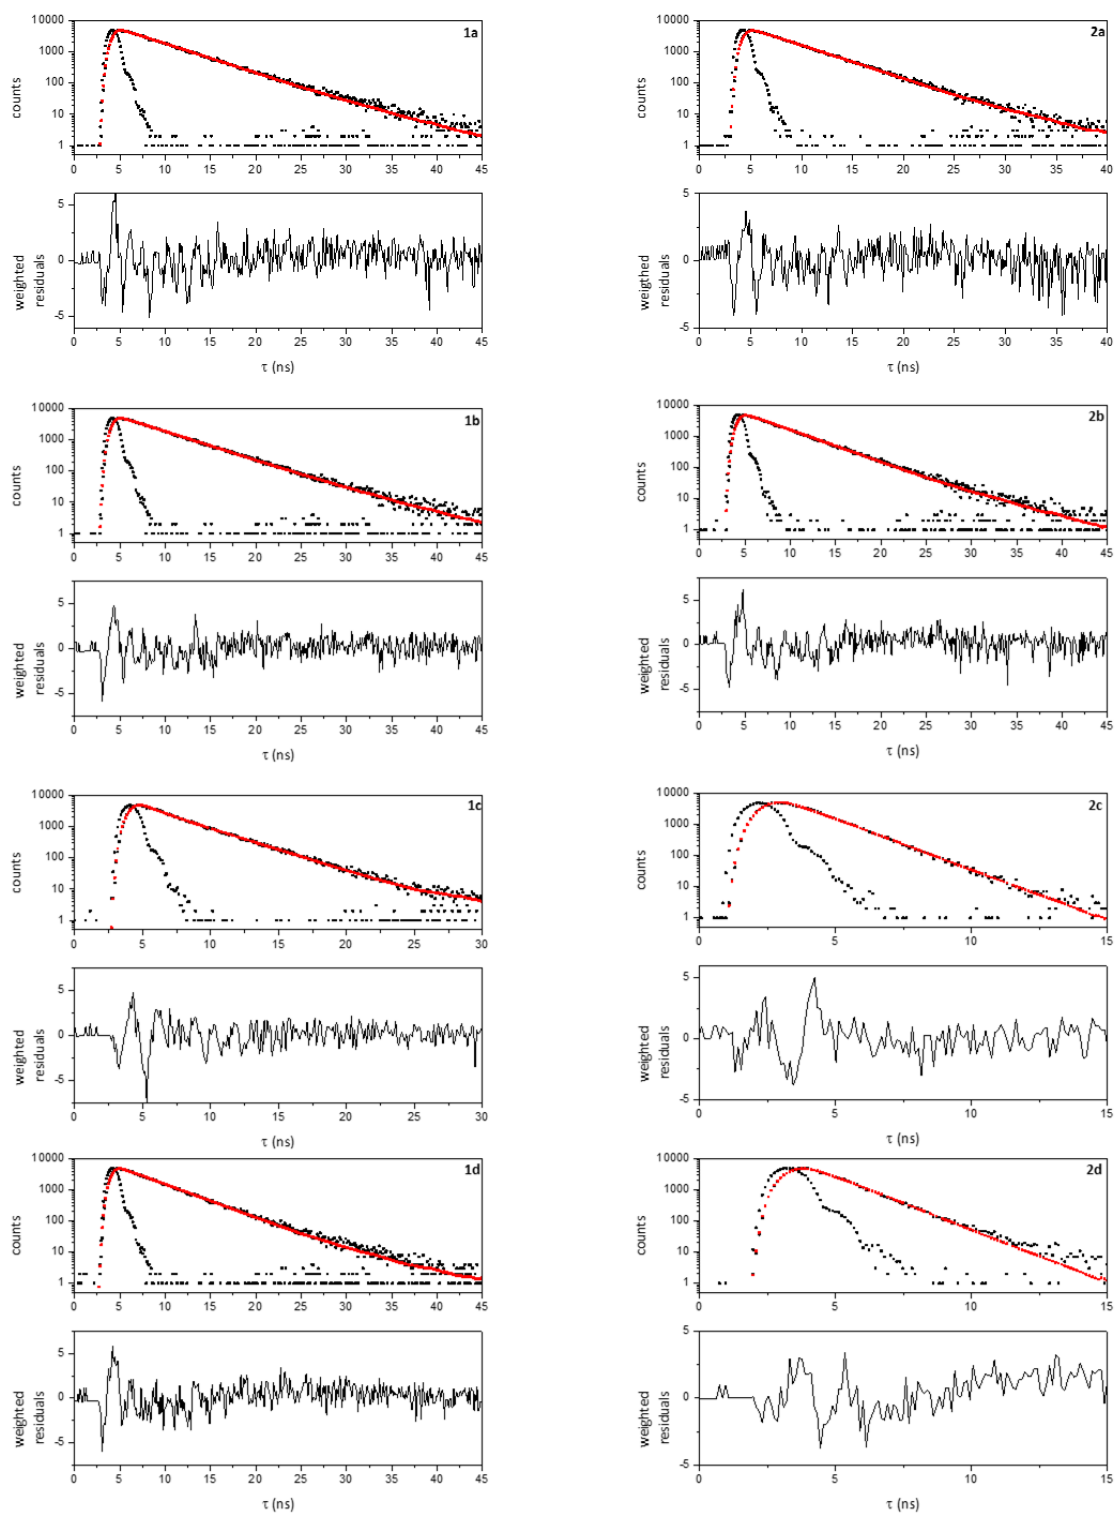

**Figure S14.** Fluorescence decay curves for compounds **1a-d**, **2a-d** in dichloromethane at 295 K.  $\lambda_{\text{exc}}$  was set at 464 nm.  $\lambda_{\text{em}}$  was set at the emission maximum for each compound. The incident light pulse and the residuals are also shown.

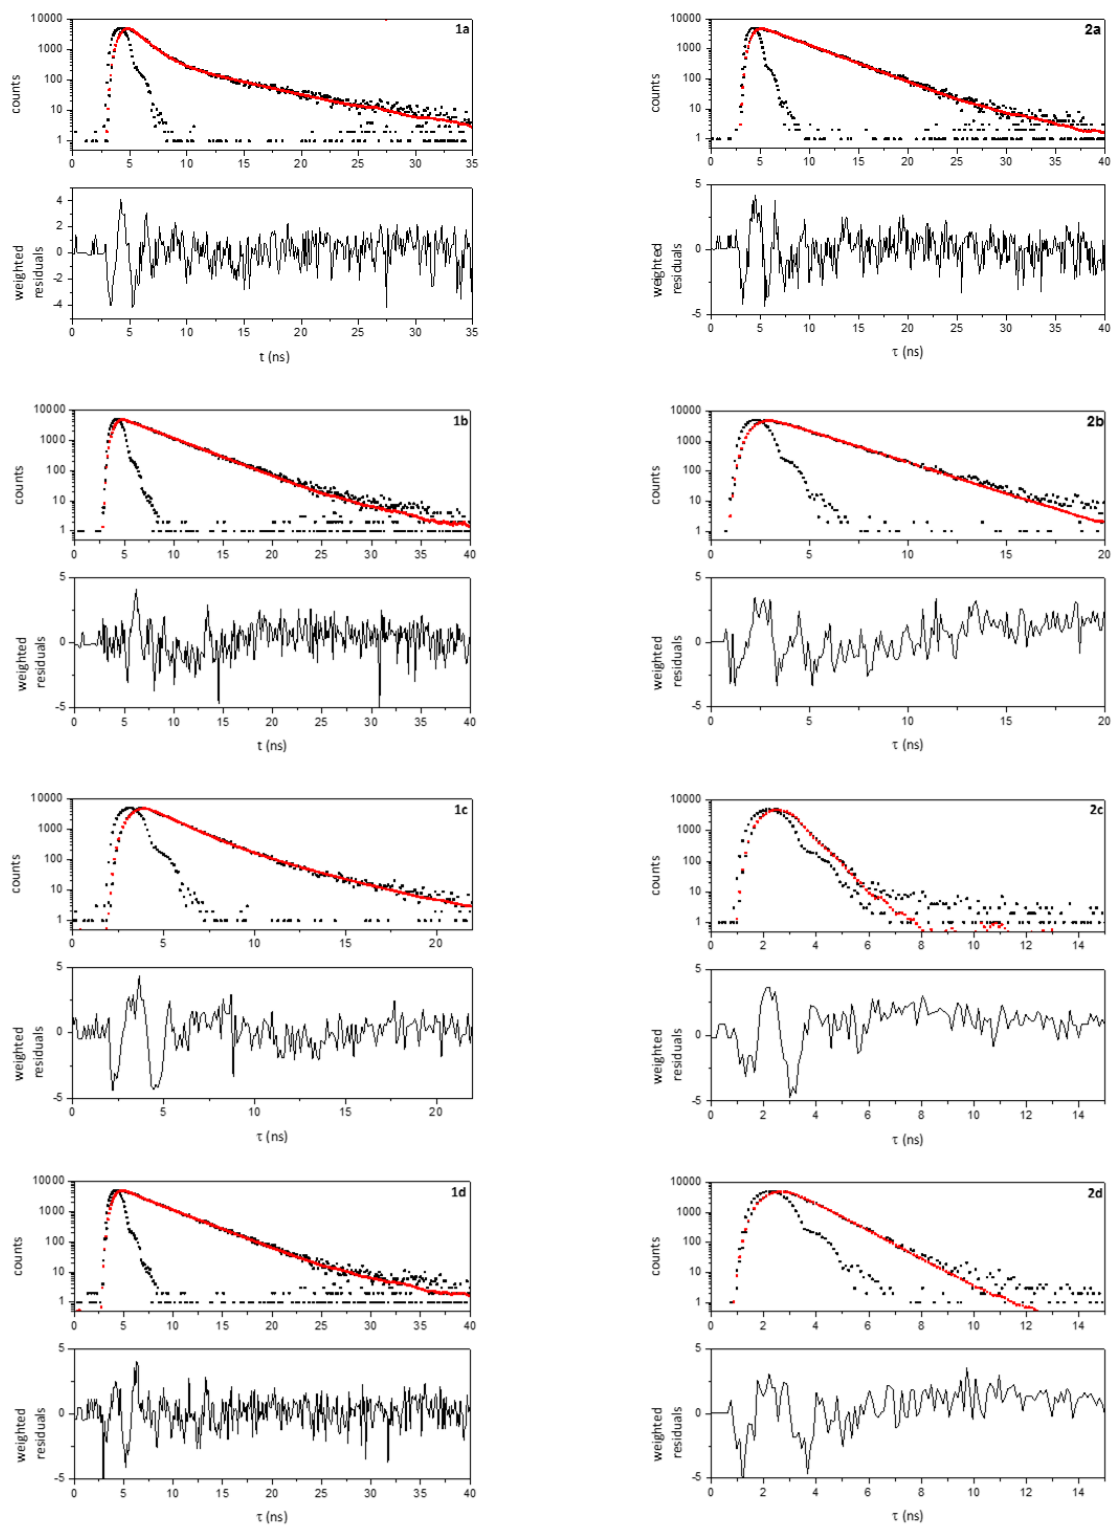

**Figure S13.** Fluorescence decay curves for compounds **1a-d**, **2a-d** in acetonitrile at 295 K.  $\lambda_{\text{exc}}$  was set at 464 nm.  $\lambda_{\text{em}}$  was set at the emission maximum for each compound. The incident light pulse and the residuals are also shown.



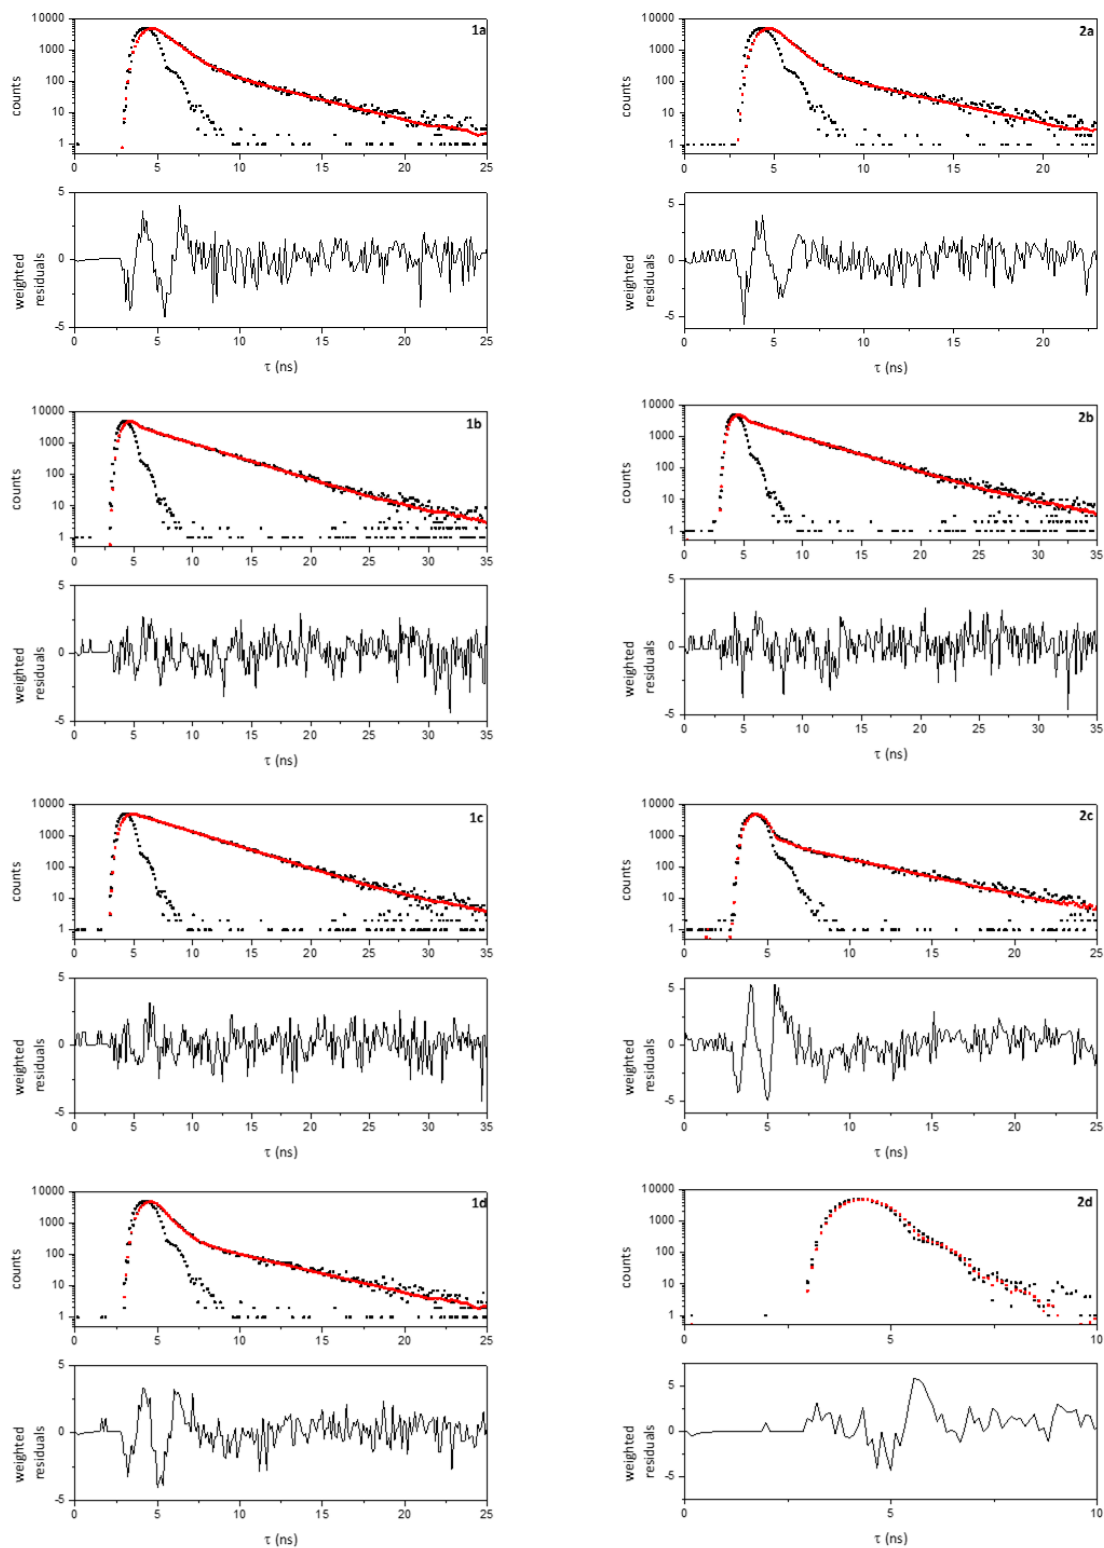

**Figure S15.** Fluorescence decay curves for compounds **1a-d**, **2a-d** in PBS (10 mM, pH 7.4) at 295 K.  $\lambda_{\text{exc}}$  was set at 464 nm.  $\lambda_{\text{em}}$  was set at the emission maximum for each compound. The incident light pulse and the residuals are also shown.

## Acid-base equilibria of hydroxypyrylium dyes

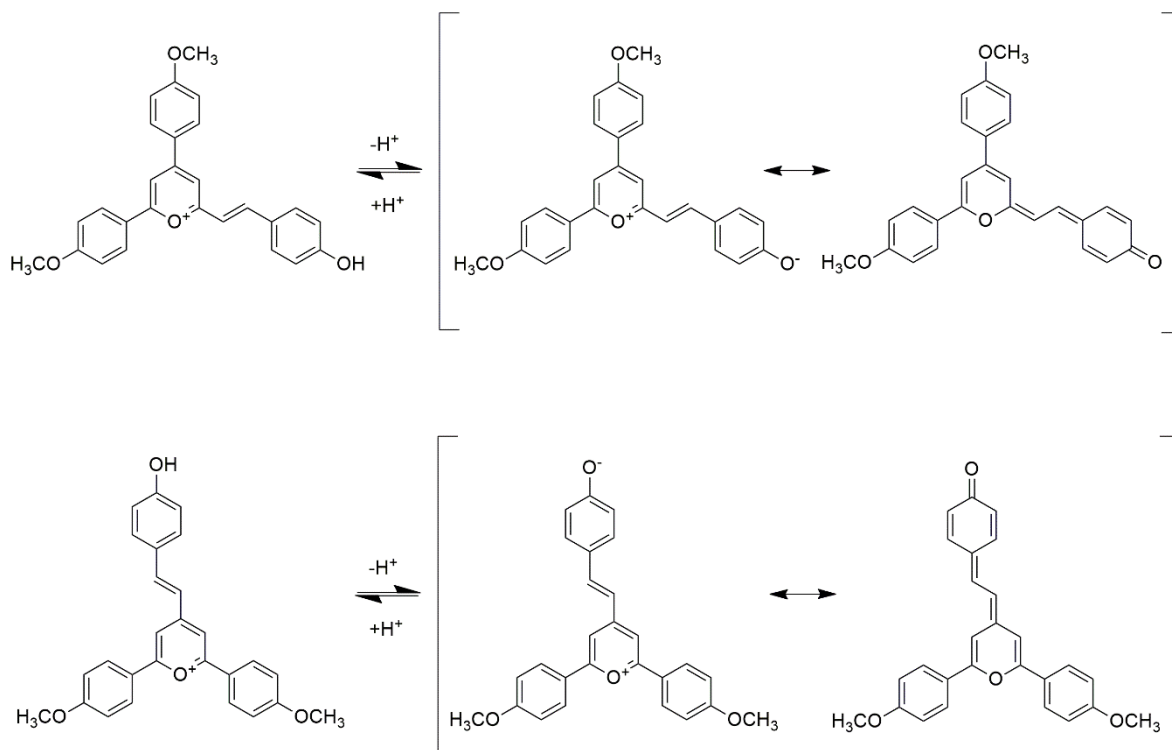

**Figure S16.** Equilibria between pyrylium cations and the quinoidal bases upon deprotonation of the hydroxyl group (top: **1c**; bottom: **2c**).

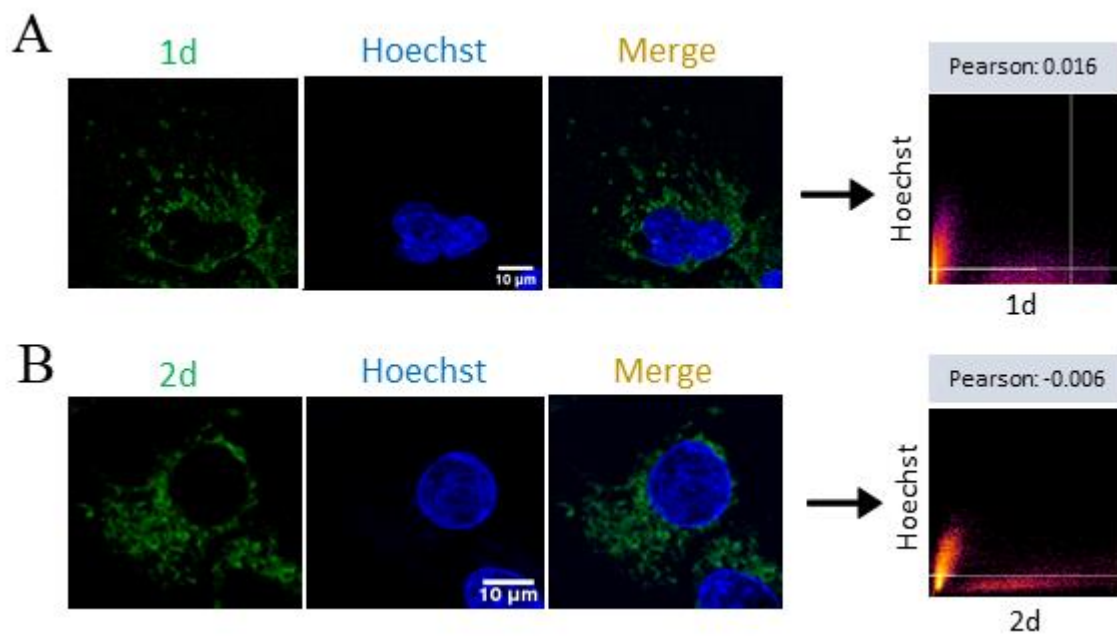

**Figure S17.** Colocalization analysis between green fluorescence (**1d** or **2d**) and blue fluorescence (Hoechst 33342). Representative images and correlation between the green and the blue fluorescent signal are displayed (Pearson's coefficient).
